# Supplementary material for: BCL-B (BCL2L10) is overexpressed in patients suffering from multiple myeloma (MM) and drives an MM-like disease in transgenic mice
Source: PubMed Central journal article supplement — J Exp Med. 2016 Aug 22;213(9):1705–22. doi: 10.1084/jem.20150983 (PMC4995074; doi:10.1084/jem.20150983), 2016-08-22
Supplement: supp_jem.20150983_JEM_20150983_sm.pdf [file supp_jem.20150983_JEM_20150983_sm.pdf]

SUPPLEMENTAL MATERIAL

Hamouda et al., <http://www.jem.org/cgi/content/full/jem.20150983/DC1>

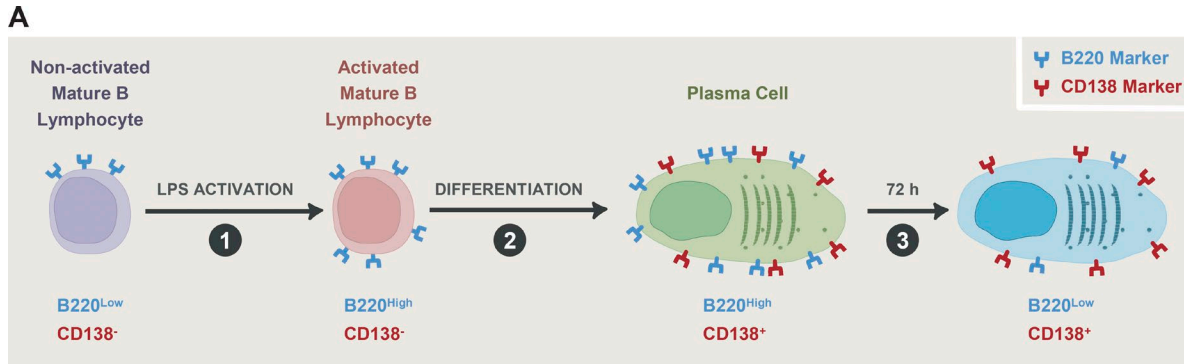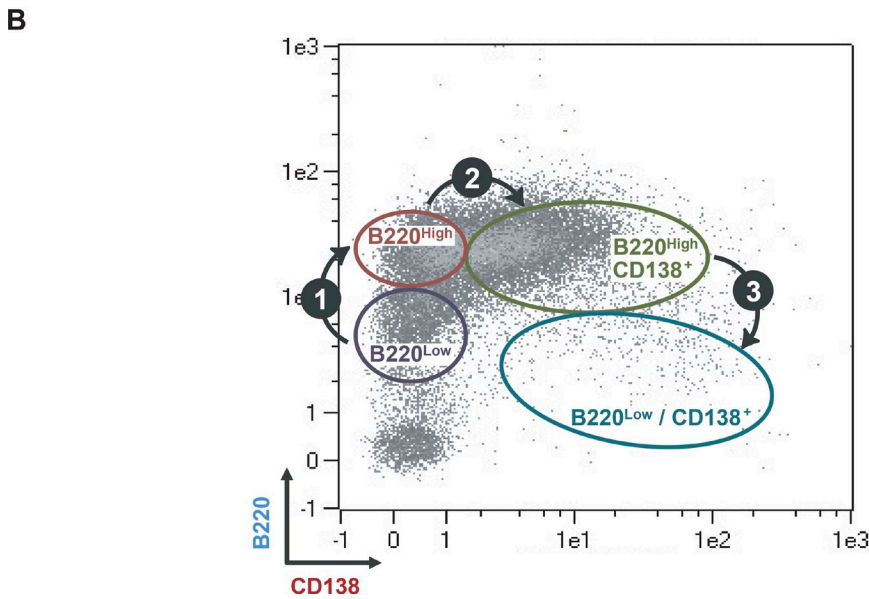

Figure S1. **Schematic representation of B cell activation and differentiation after LPS stimulation.** (A) During plasmacyte differentiation, B cells first exhibit increased expression of B220 (low to high; 1). Then, they differentiate into B220<sup>+</sup>/CD138<sup>+</sup> plasmocytes (2). Finally, long-lived PCs lose the B220 marker (3). (B) Representation of the characteristic distribution of B cells after LPS treatment.

Table S1. List of antibodies used for flow cytometry, Western blot, and immunohistochemistry

| Antibody                    | Source | Reference   | Supplier                                  | Conjugate    |
|-----------------------------|--------|-------------|-------------------------------------------|--------------|
| <b>Flow cytometry</b>       |        |             |                                           |              |
| Mouse B220                  | Rat    | 103227      | BioLegend                                 | Pacific blue |
| Mouse IgD                   | Rat    | 560868      | BD                                        | APC          |
| Mouse IgD                   | Rat    | 405706      | BioLegend                                 | PE           |
| Mouse CD138                 | Rat    | 558626      | BD                                        | APC          |
| Mouse CD4                   | Rat    | 553049      | BD                                        | PE           |
| Mouse CD8                   | Rat    | 558106      | BD                                        | Vioblue      |
| Human CD138                 | Mouse  | 130091250   | Miltenyi Biotec                           | APC          |
| Anti-Bcl-B                  | Rabbit | 3869        | Cell Signaling Technology                 |              |
| Nonrelevant IgG             | Rabbit | 3888        | Santa Cruz Biotechnology, Inc.            |              |
| Anti-rabbit IgG             | Donkey | A21206      | Invitrogen                                | Alexa 488    |
| <b>Western blot</b>         |        |             |                                           |              |
| Anti-Bcl-B                  | Rabbit | 3869        | Cell Signaling Technology                 |              |
| Anti-Bcl-2                  | Rabbit | 2872        | Cell Signaling Technology                 |              |
| Anti-Mcl-1                  | Rabbit | 4572        | Cell Signaling Technology                 |              |
| Anti-Xbp-1                  | Rabbit | 7160        | Santa Cruz Biotechnology, Inc.            |              |
| Anti-Myc-Tag                | Rabbit | 2278        | Cell Signaling Technology                 |              |
| Anti-Bim                    | Rabbit | 2819        | Cell Signaling Technology                 |              |
| Anti-Actin                  | Goat   | 1616        | Santa Cruz Biotechnology, Inc.            |              |
| Anti-Hsp60                  | Goat   | 1722        | Santa Cruz Biotechnology, Inc.            |              |
| Anti-rabbit IgG-HRP         | Goat   | 7074        | Cell Signaling Technology                 |              |
| Anti-goat IgG-HRP           | Rabbit | P0449       | Dako                                      |              |
| <b>Immunohistochemistry</b> |        |             |                                           |              |
| Anti-mouse CD138            | Rat    | 553712      | BD                                        |              |
| Anti-rat IgG                | Mouse  | 550325      | BD                                        | Biotin       |
| <b>Immunohistochemistry</b> |        |             |                                           |              |
| Anti-mouse CD138            | Rat    | 60035       | STEMCELL Technologies                     |              |
| Anti-rat Alexa Fluor 647    |        | 112-606-003 | Jackson ImmunoResearch Laboratories, Inc. |              |

Table S2. List of primers used for quantitative PCR

| Target            | Primer forward                  | Primer reverse                  |
|-------------------|---------------------------------|---------------------------------|
| <i>bclb</i>       | 5'-GCGGCTAAAGGAGCAGGAGG-3'      | 5'-CTTTCACCTCAAGGAAGAGC-3'      |
| <i>ccnd1</i>      | 5'-CGCCCTCCGTATCTTACTTCAA-3'    | 5'-AGCGGGAAGACCTCTCTTC-3'       |
| <i>ccnd2</i>      | 5'-CCCAGTGTTCCTATTCAA-3'        | 5'-AATTCATGGCCAGAGGAAAGAC-3'    |
| <i>bmp-6</i>      | 5'-CTACGCTGCCAACTACTGTGATG-3'   | 5'-GGATTCATAAGGTGGACCAAGGT-3'   |
| <i>trap</i>       | 5'-TGGGCGGCTTACACAT-3'          | 5'-GGCTGGTCTTAAAGAGTGATTTTCC-3' |
| <i>rank</i>       | 5'-TGGACACCTGGAATGAAGAAGA-3'    | 5'-CAGCACTCGCAGTCTGAGTTC-3'     |
| <i>rank-1</i>     | 5'-GTCTGCAGCATCGCTCTGTT-3'      | 5'-CAGGAGTCAGGTAGTGTCTTCA-3'    |
| <i>il-7</i>       | 5'-CATCATCTGAGTGCCACATTAAGA-3'  | 5'-GGGCAATTAATATCAGTTCCTGTCA-3' |
| <i>igf-1</i>      | 5'-TCATGTCGTCTTACACCTCTTCT-3'   | 5'-CCACACACGAACTGAAGAGCAT-3'    |
| <i>tgf-β2</i>     | 5'-CGTCCGCTTTGATGTCTCA-3'       | 5'-GCTGGTGGGAGATGTTAAGT-3'      |
| <i>xbp-1</i>      | 5'-ACACGCTTGGGAATGGACAC-3'      | 5'-CCATGGGAAGATGTTCTGGG-3'      |
| <i>myc</i>        | 5'-AGCCCTAGTGCTGCATGA-3'        | 5'-GTTTGCCTTCTCCACAGACA-3'      |
| <i>maf</i>        | 5'-AGCAGTTGGTGACCATGTCG-3'      | 5'-TTTCAGGGTCCGCCTCTTCT-3'      |
| <i>jun</i>        | 5'-AGTCCAGCAATGGGCACATC-3'      | 5'-AAGCGTGTCTGGCATGCA-3'        |
| <i>il-6</i>       | 5'-ACAAGTCGGAGGCTTAATTACACAT-3' | 5'-AAGTGCATCATCGTTGTTTCATACA-3' |
| <i>ubiquitin</i>  | 5'-AAGAATTCAGATCGGATGACACACT-3' | 5'-GCCACTTGGAGGTTGACACTTT-3'    |
| <i>beta actin</i> | 5'-AAGATCTGGCACCACACCTTCT-3'    | 5'-TTTTACGGTTGGCCTTAGG-3'       |

Table S3. **IgH and IgK gene rearrangement and somatic mutations in mouse tumors**

| CD138 <sup>+</sup> DNA from | V gene                      | D gene       | JH gene  | No. of bp analyzed | No. of mutations (median) | % of mutations | Status <sup>a</sup> | Presence of intracлонаl variation | No. of identical clones/total clones sequenced |
|-----------------------------|-----------------------------|--------------|----------|--------------------|---------------------------|----------------|---------------------|-----------------------------------|------------------------------------------------|
| <b>IgH rearrangement</b>    |                             |              |          |                    |                           |                |                     |                                   |                                                |
| Tumor #1                    | IGHV1-63*02                 | IGHD2-1*01   | IGHJ4*01 | 677                | 16                        | 2.36%          | M, C                | yes                               | 5 out of 5                                     |
|                             | IGHV1-63*02 <sup>b</sup>    | IGHD2-1*01   | IGHJ4*01 | 677                | 33                        | 4.87%          |                     |                                   |                                                |
| Tumor #2                    | IGHV1-39*01                 | not assigned | IGHJ4*01 | 666                | 14                        | 2.10%          | M, O                | no                                | 3 out of 6                                     |
| Tumor #3 <sup>c</sup>       | IGHV1S36*01                 | IGHD3-13*01  | IGHJ2*01 | 774                | 32                        | 4.13%          | M, P                | no                                | 2 out of 10                                    |
|                             | IGHV1-56*01                 | IGHD3-2*01   | IGHJ2*01 | 774                | 21                        | 2.71%          | M, P                | no                                | 2 out of 10                                    |
|                             | IGHV1-53*01                 | IGHD1-1*01   | IGHJ3*01 | 720                | 11                        | 1.53%          | M, P                | no                                | 2 out of 10                                    |
|                             | IGHV1S126*01 or IGHV1S35*01 | IGHD1-3*01   | IGHJ3*01 | 720                | 8                         | 1.11%          | M, P                | no                                | 3 out of 10                                    |
| <b>IgH rearrangement</b>    |                             |              |          |                    |                           |                |                     |                                   |                                                |
| WT_PC_clone 1               | IGHV1-39*01 or IGHV1-34*01  | IGHD1-1*01   | IGHJ4*01 | 681                | 13 <sup>d</sup>           | 1.91%          | M                   | no                                | 2                                              |
| WT_PC_clone 2               | IGHV1S126*01 or IGHV1S35*01 | IGHD2-5*01   | IGHJ4*01 | 672                | 8 <sup>d</sup>            | 1.19%          | M                   | no                                | 2                                              |
| WT_PC_clone 3               | IGHV1-82*01                 | IGHD2-1*01   | IGHJ4*01 | 672                | 12 <sup>d</sup>           | 1.79%          | M                   | no                                | 1                                              |
| WT_PC_clone 4               | IGHV1-56*01                 | IGHD2-4*01   | IGHJ3*01 | 179                | 3 <sup>d</sup>            | 1.68%          | M                   | no                                | 1                                              |
| WT_PC_clone 5               | IGHV1-53 or IGHV1-56        | IGHD4-1*02   | IGHJ3*01 | 538                | 18 <sup>d</sup>           | 3.35%          | M                   | no                                | 1                                              |
| WT_PC_clone 6               | IGHV1S126*01                | IGHD2-9*01   | IGHJ2*01 | 664                | 1 <sup>d</sup>            | 0.15%          | UM                  | no                                | 1                                              |
| WT_PC_clone 7               | IGHV1-63*01                 | IGHD1-1*01   | IGHJ2*01 | 669                | 6 <sup>d</sup>            | 0.90%          | M                   | no                                | 1                                              |
| WT_PC_clone 8               | IGHV14-3*01, IGHV1-63       | IGHD4-1*02   | IGHJ2*01 | 652                | 1 <sup>d</sup>            | 0.15%          | M                   | no                                | 1                                              |
| WT_PC_clone 9               | IGHV1-77*01                 | IGHD2-5*01   | IGHJ2*01 | 659                | 0 <sup>d</sup>            | 0%             | UM                  | no                                | 1                                              |
| <b>IgK rearrangement</b>    |                             |              |          |                    |                           |                |                     |                                   |                                                |
| Tumor #1                    | IGKV4-79*01                 |              | IGKJ4*01 | 594                | 14                        | 2.36%          | M, C                | yes                               | 5 out of 5                                     |
| Tumor #2                    | IGKV4-59*01                 |              | IGKJ5*01 | 261                | 5                         | 1.92%          | M, O                | yes                               | 4 out of 5                                     |
| Tumor #3                    | IGKV4-59*01                 |              | IGKJ2*01 | 815                | 23                        | 2.82%          | M, O                | no                                | 4 out of 8                                     |

<sup>a</sup>C, clonal; M, mutated; O, oligoclonal; P, polyclonal; UM, unmutated.

<sup>b</sup>Subclone of the tumor #1 accumulating mutations in the VDJ junction indicative of ongoing SHM.

<sup>c</sup>The tumor #3 is polyclonal with five distinct rearrangements among 10 sequenced clones (4 clones are shown).

<sup>d</sup>Total number of mutations is shown rather than the median.

Table S4. **Comparison of the biological and clinical features of available MM mouse models; overlap with clinical features of human MM**

| Parameter                                    | Human MM             | 3 <sup>+</sup> KE/ <i>bcl-X<sub>L</sub></i> | <i>bcl-X<sub>L</sub></i> × <i>imyc</i> | <i>VK*myc</i>                              | <i>Εμ-xbp1</i>                      | <i>Εμ-c-maf</i>                              | <i>Εμ-bcl-b</i>                            |
|----------------------------------------------|----------------------|---------------------------------------------|----------------------------------------|--------------------------------------------|-------------------------------------|----------------------------------------------|--------------------------------------------|
|                                              |                      | C57BL/6                                     | C57BL/6x129SvJ                         | C57BL/6                                    | C57BL/6                             | C57BL/6                                      | C57BL/6                                    |
| Shorter life span                            | Yes                  | No                                          | Yes                                    | Yes                                        | Yes                                 | Yes                                          | Yes                                        |
| Plasmacytosis localization                   | BM                   | Spleen                                      | BM, EM                                 | BM                                         | BM, EM                              | BM, EM                                       | BM                                         |
| Indolent                                     | Yes                  | Yes                                         | No                                     | Yes                                        | Yes                                 | Yes                                          | Yes                                        |
| Most common Ig isotype                       | IgG                  | IgM, IgG1, IgG2, IgA, IgE                   | IgG > IgM                              | IgG                                        | IgM >> IgG                          | IgG = IgM                                    | IgG2b                                      |
| Age-related M-spike IgG [g/liter], × control | Yes, >35, 5X control | No, ND, 1–2.5× control                      | Yes, ND, 5–10× control                 | Yes, 80% at 50 wk, 15 at 70 wk, 5× control | Yes, 30% at 50 wk, ND, 1.5× control | Yes, 50% at 120 wk, 17 at 120 wk, 2× control | Yes, 50% at 50 wk, 30 at 70 wk, 3× control |
| Transplantability between mice               | Yes                  | ND                                          | Yes                                    | Yes                                        | No                                  | No                                           | Yes                                        |
| Anemia                                       | Yes                  | ND                                          | ND                                     | Yes                                        | ND                                  | ND                                           | Yes                                        |
| Lytic bone disease                           | Yes                  | No                                          | Yes                                    | Yes                                        | Yes                                 | No                                           | Yes                                        |
| Kidney disease                               | Yes                  | Yes                                         | ND                                     | Yes                                        | Yes                                 | Yes                                          | Yes                                        |
| Splenomegaly                                 | Rare                 | No                                          | Yes, 100% at 6 wk                      | Yes, 30% at 70 wk                          | No                                  | No                                           | Yes, 53% at 70 wk                          |
